# Supplementary material for: Protection against Marburg Virus and Sudan Virus in NHP by an Adenovector-Based Trivalent Vaccine Regimen Is Correlated to Humoral Immune Response Levels
Source: MDPI journal article supplement (doi:10.3390/vaccines10081263), 2022-08-05
Supplement: s1 [file s1]

**Supplementary Table S1.** SUDV GP-binding antibody concentrations measured 1 week prior to challenge.

| SUDV Study | Animal ID | Dose 1      | Dose 2      | Immunization Schedule (days) | SUDV GP-Binding Concentration EU/mL [log 10] 1 Week Prior to Challenge | Survival (Y/N) | Reference                  |
|------------|-----------|-------------|-------------|------------------------------|------------------------------------------------------------------------|----------------|----------------------------|
| 8          | 32236     | Ad26.Filo   | Ad35.Filo   | 0, 28                        | 3.85                                                                   | Y              | Callendret et al. 2018 [1] |
|            | 32239     | Ad26.Filo   | Ad35.Filo   | 0, 28                        | 3.91                                                                   | Y              |                            |
|            | 32240     | Ad26.Filo   | Ad35.Filo   | 0, 28                        | 3.73                                                                   | Y              |                            |
|            | 32242     | Ad26.Filo   | Ad35.Filo   | 0, 28                        | 3.38                                                                   | N              |                            |
|            | 32235     | Ad26.Filo   | Ad26.Filo   | 0, 28                        | 3.67                                                                   | Y              |                            |
|            | 32237     | Ad26.Filo   | Ad26.Filo   | 0, 28                        | 3.47                                                                   | Y              |                            |
|            | 32241     | Ad26.Filo   | Ad26.Filo   | 0, 28                        | 3.16                                                                   | N              |                            |
|            | 32234     | Ad26.Filo   | Ad26.Filo   | 0, 28                        | 3.32                                                                   | Y              |                            |
|            | 32300     | none        | Ad5.SEBOV   | 0, 28                        | 1.92                                                                   | N              |                            |
|            | 32244     | none        | Ad5.SEBOV   | 0, 28                        | 2.05                                                                   | Y              |                            |
| 29#4       | AL403C    | Ad26.Filo   | MVA-BN-Filo | 0, 56                        | 3.86                                                                   | Y              | Figure 1                   |
|            | AB9851    | Ad26.Filo   | MVA-BN-Filo | 0, 56                        | 3.76                                                                   | Y              |                            |
|            | AK990H    | Ad26.Filo   | MVA-BN-Filo | 0, 56                        | 4.14                                                                   | Y              |                            |
|            | AL765D    | Ad26.Filo   | MVA-BN-Filo | 0, 56                        | 3.80                                                                   | Y              |                            |
|            | BF944C    | Ad26.Filo   | MVA-BN-Filo | 0, 56                        | 3.85                                                                   | Y              |                            |
|            | BF902C    | MVA-BN-Filo | Ad26.Filo   | 0, 56                        | 3.31                                                                   | N              |                            |
|            | AS96B     | MVA-BN-Filo | Ad26.Filo   | 0, 56                        | 3.67                                                                   | Y              |                            |
|            | AP128C    | MVA-BN-Filo | Ad26.Filo   | 0, 56                        | 3.45                                                                   | Y              |                            |
|            | AJ786F    | MVA-BN-Filo | Ad26.Filo   | 0, 56                        | 3.30                                                                   | N              |                            |
|            | AL789F    | MVA-BN-Filo | Ad26.Filo   | 0, 56                        | 3.88                                                                   | Y              |                            |
|            | BF855B    | Ad26.Filo   | Ad35.Filo   | 0, 56                        | 3.43                                                                   | Y              |                            |
|            | AB786M    | Ad26.Filo   | Ad35.Filo   | 0, 56                        | 3.61                                                                   | Y              |                            |
|            | BF842C    | Ad26.Filo   | Ad35.Filo   | 0, 56                        | 3.69                                                                   | Y              |                            |
|            | C912HF    | Ad26.Filo   | Ad35.Filo   | 0, 56                        | 3.87                                                                   | Y              |                            |
|            | AC21K     | Ad26.Filo   | Ad35.Filo   | 0, 56                        | 3.64                                                                   | Y              |                            |

SUDV, Sudan virus; GP, glycoprotein; EU, enzyme-linked immunosorbent assay unit; Y, yes; N, no; Ad26, adenoviral vector serotype 26; Ad35, adenoviral vector serotype 35; Ad5 adenoviral vector serotype 5, MVA, modified vaccinia Ankara.

**Supplementary Table S2.** MARV GP-binding antibody concentrations measured 1 week prior to challenge.

| MARV Study | Animal ID | Dose 1           | Dose 2           | Dose 3           | Immunization Schedule (days) | MARV GP-Binding Concentration EU/mL [log10] 1 Week Prior to Challenge | Survival (Y/N) | Reference                  |
|------------|-----------|------------------|------------------|------------------|------------------------------|-----------------------------------------------------------------------|----------------|----------------------------|
| <b>6A</b>  | 31611     | Ad26 tetravalent | Ad35 tetravalent | -                | 0, 28*                       | 1.79                                                                  | Y              | Callendret et al. 2018 [1] |
|            | 31612     | Ad26 tetravalent | Ad35 tetravalent | -                | 0, 28*                       | 1.15                                                                  | N              |                            |
|            | 31614     | Ad26 tetravalent | Ad35 tetravalent | -                | 0, 28*                       | 1.32                                                                  | N              |                            |
|            | 31616     | Ad26 tetravalent | Ad35 tetravalent | -                | 0, 28*                       | 1.83                                                                  | N              |                            |
|            | 31617     | Ad26 tetravalent | Ad35 tetravalent | -                | 0, 28*                       | 1.91                                                                  | N              |                            |
|            | 31621     | Ad26 tetravalent | Ad35 tetravalent | -                | 0, 28*                       | 1.23                                                                  | N              |                            |
|            | 31870     | Ad26.MARVA       | Ad35.MARVA       | -                | 0, 56                        | 2.96                                                                  | Y              |                            |
| <b>6B</b>  | AP34      | Ad26 tetravalent | Ad35 tetravalent | Ad26 tetravalent | 0, 28, C-4 <sup>†</sup>      | 2.98                                                                  | Y              | Callendret et al. 2018 [1] |
|            | AP528     | Ad26 tetravalent | Ad35 tetravalent | Ad26 tetravalent | 0, 28, C-4 <sup>†</sup>      | 3.69                                                                  | Y              |                            |
|            | AR120     | Ad26 tetravalent | Ad35 tetravalent | Ad26 tetravalent | 0, 28, C-4 <sup>†</sup>      | 3.11                                                                  | Y              |                            |
|            | AR968     | Ad26 tetravalent | Ad35 tetravalent | Ad26 tetravalent | 0, 28, C-4 <sup>†</sup>      | 3.05                                                                  | Y              |                            |
|            | AT709     | Ad26 tetravalent | Ad35 tetravalent | Ad26 tetravalent | 0, 28, C-4 <sup>†</sup>      | 3.11                                                                  | Y              |                            |
|            | BM515     | Ad26 tetravalent | Ad35 tetravalent | Ad26 tetravalent | 0, 28, C-4 <sup>†</sup>      | 3.05                                                                  | Y              |                            |
|            | A13960    | -                | -                | Ad5.MARVA        | C-4                          | 2.09                                                                  | Y              |                            |
|            | A13377    | Ad26.Filo        | Ad26.Filo        | -                | 0, 28                        | 2.59                                                                  | Y              |                            |
|            | A13391    | Ad26.Filo        | Ad26.Filo        | -                | 0, 28                        | 2.77                                                                  | Y              |                            |
|            | A12903    | Ad26.Filo        | Ad26.Filo        | -                | 0, 28                        | 2.68                                                                  | Y              |                            |
|            | 33822     | Ad26.Filo        | MVA-BN-Filo      | -                | 0, 56                        | 2.79                                                                  | Y              |                            |
|            | 33827     | Ad26.Filo        | MVA-BN-Filo      | -                | 0, 56                        | 3.01                                                                  | Y              |                            |
| <b>13</b>  | 33842     | Ad26.Filo        | MVA-BN-Filo      | -                | 0, 56                        | 2.43                                                                  | Y              | Figure 2                   |
|            | 33658     | Ad26.Filo        | MVA-BN-Filo      | -                | 0, 56                        | 2.77                                                                  | Y              |                            |
|            | 33841     | Ad26.Filo        | MVA-BN-Filo      | -                | 0, 56                        | 2.26                                                                  | Y              |                            |
|            | 33836     | MVA-BN-Filo      | Ad26.Filo        | -                | 0, 56                        | 3.03                                                                  | Y              |                            |
|            | 33824     | MVA-BN-Filo      | Ad26.Filo        | -                | 0, 56                        | 2.77                                                                  | N              |                            |
|            | 33840     | MVA-BN-Filo      | Ad26.Filo        | -                | 0, 56                        | 2.99                                                                  | Y              |                            |
|            | 33843     | MVA-BN-Filo      | Ad26.Filo        | -                | 0, 56                        | 2.12                                                                  | N              |                            |
|            | 33815     | MVA-BN-Filo      | Ad26.Filo        | -                | 0, 56                        | 3.00                                                                  | Y              |                            |
|            | 33829     | Ad26.Filo        | Ad35.Filo        | -                | 0, 56                        | 2.79                                                                  | Y              |                            |

|  |       |           |           |   |       |      |   |  |
|--|-------|-----------|-----------|---|-------|------|---|--|
|  | 33277 | Ad26.Filo | Ad35.Filo | - | 0, 56 | 3.09 | Y |  |
|  | 33826 | Ad26.Filo | Ad35.Filo | - | 0, 56 | 2.76 | Y |  |
|  | 33834 | Ad26.Filo | Ad35.Filo | - | 0, 56 | 3.01 | Y |  |

\*MARV challenge was performed 12 months after immunization.

†Animals received a tetravalent Ad26 booster 4 weeks before MARV challenge.

MARV, Marburg virus; GP, glycoprotein; EU, enzyme-linked immunosorbent assay unit; Y, yes; N, no; Ad26, adenoviral vector serotype 26; Ad35, adenoviral vector serotype 35; MVA, modified vaccinia Ankara.

## Supplementary Figures

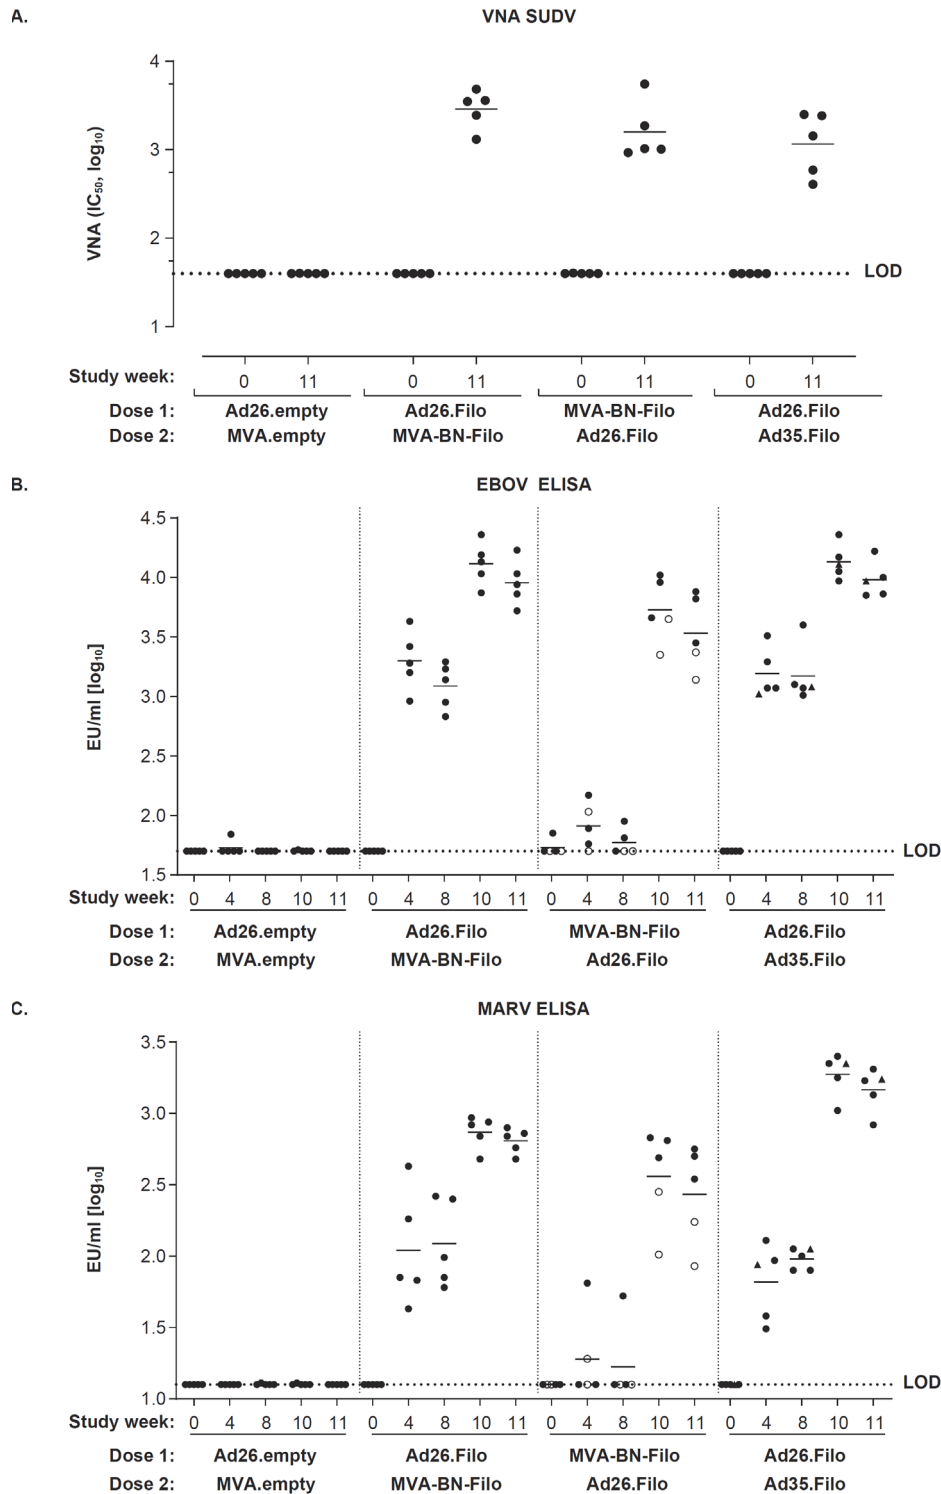

**Supplementary Figure S1.** SUDV-neutralizing antibodies and EBOV Mayinga and MARV GP-specific antibody concentrations. Twenty cynomolgus macaques were immunized i.m. with Ad26.Filo as dose 1 at week 0 and MVA-BN-Filo or Ad35.Filo as dose 2 at week 8, or MVA-BN-Filo as dose 1 and Ad26.Filo as dose 2, or empty Ad26 and empty MVA-BN vector ( $n = 5$  per group). Adenovirus vaccines were given at  $1.2 \times 10^{11}$  vp ( $4 \times 10^{10}$  vp/vector) and the MVA-

BN-Filo vector at a dose of  $5 \times 10^8$  TCID<sub>50</sub>. **(A)** SUDV Gulu neutralization is expressed as IC<sub>50</sub> titers on a log<sub>10</sub> scale. The neutralization was measured in samples collected before dose 1 (t = 0) and 3 weeks post-dose 2 (week 11). The dotted line indicates lower limit of detection of the assay (LOD = 1.6 log<sub>10</sub>). Black bars indicate geometric mean of the titers within each group. **(B,C)** Humoral immune responses were measured over time by EBOV and MARV GP-specific ELISA. Each symbol represents an individual NHP at the indicated time point, with the closed circles representing the non-symptomatic survivors, open circles the non-survivors, and triangles the symptomatic survivors (symptomatic is defined as clinical score >0). Means per group are indicated with the black horizontal line, and the dashed horizontal line represents the LOD. VNA, virus neutralization assay; SUDV, Sudan virus; IC<sub>50</sub>, half-maximal inhibitory concentration; LOD, limit of detection; Ad26; adenoviral vector serotype 26; MVA, modified vaccinia Ankara; Ad35, adenoviral vector serotype 35; EBOV, Ebola virus; ELISA, enzyme-linked immunosorbent assay; EU, ELISA unit; MARV, Marburg virus; GP, glycoprotein; i.m. intramuscularly; vp, viral particle; TCID<sub>50</sub>, median tissue culture infectious dose; NHP, non-human primate.

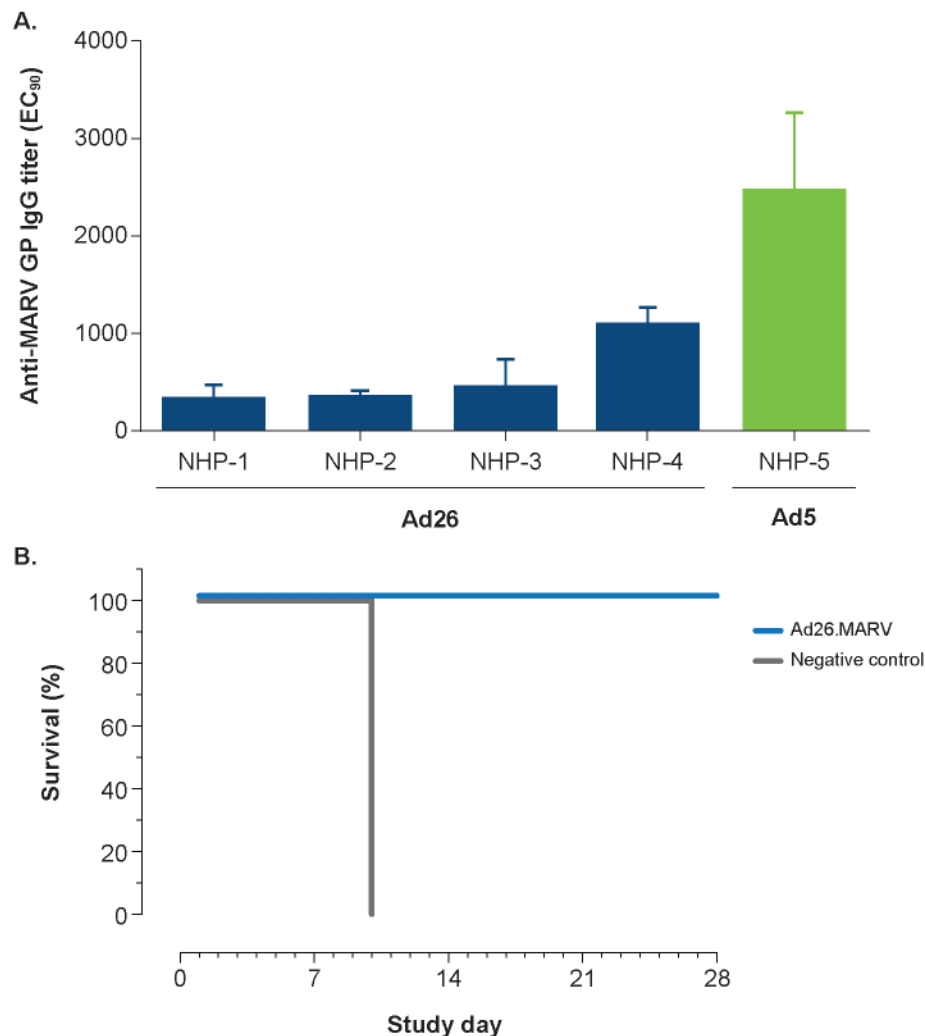

**Supplementary Figure S2.** Efficacy of a single administration of an Ad26 vector encoding the MARV GP. **(A)** Five cynomolgus macaques were immunized i.m. with a single dose of Ad26.MARV (n = 4) or Ad5.MARV (n = 1), and 1 animal was included as negative control. Adenovirus vaccines were given at  $1 \times 10^{11}$  vp, and 5 weeks after immunization the animals were challenged i.m. with 1000 pfu MARV Angola. Humoral responses were measured in serum 1 week prior to challenge. **(B)** Kaplan-Meier representation of survival. MARV, Marburg virus; GP, glycoprotein;

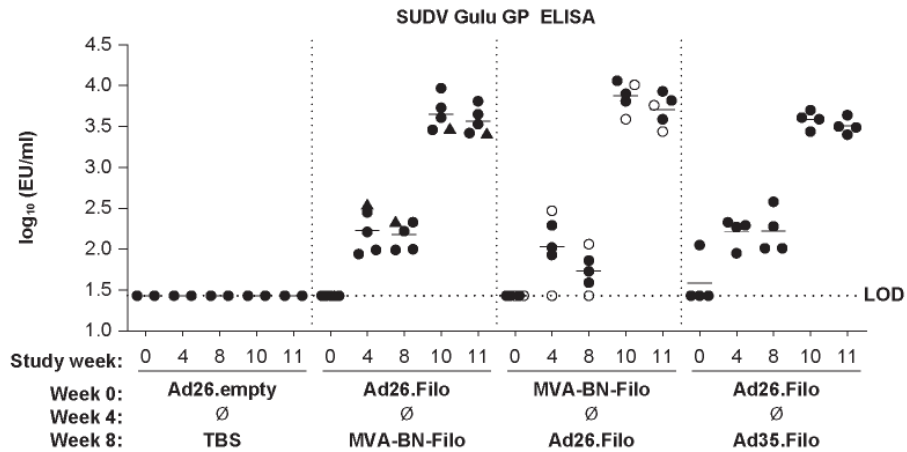

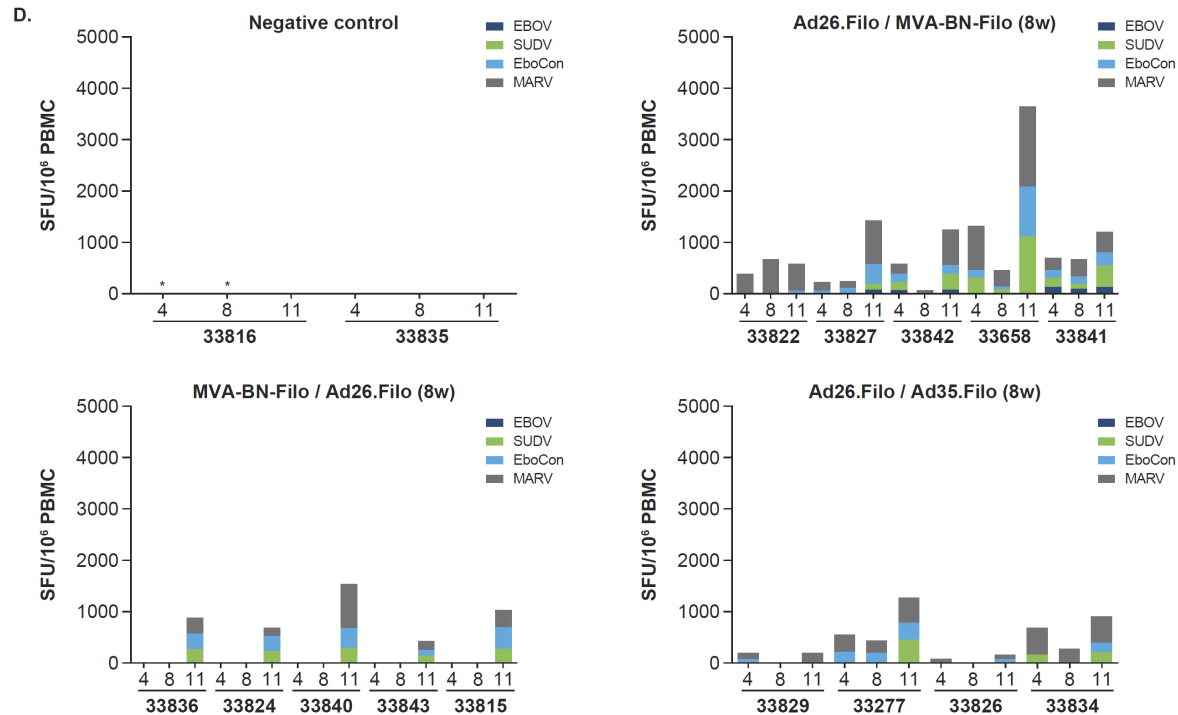

**Supplementary Figure S3.** Humoral and cellular immune responses. Fourteen cynomolgus macaques were immunized i.m. with a two-dose trivalent vaccine combination of Ad26.Filo, MVA-BN-Filo ( $n = 5$ ), MVA-BN-Filo, Ad26.Filo ( $n = 5$ ), or Ad26.Filo, Ad35.Filo ( $n = 4$ ) with an 8-week interval; 2 cynomolgus macaques were included as negative controls and received Ad26 empty vector at week 0 and TBS at week 8. Adenovirus vaccines were given at  $1.2 \times 10^{11}$  vp ( $4 \times 10^{10}$  vp/vector), and the MVA-BN-Filo vector at a dose of  $5 \times 10^8$  TCID<sub>50</sub>. (A) MARV Angola neutralization is expressed as IC<sub>50</sub> titers on a log<sub>10</sub> scale. The neutralization was measured in samples collected before dose 1 ( $t = 0$ ) and 3 weeks post-dose 2 (week 11). The dotted line indicates lower limit of detection of the assay (LOD = 1.6 log<sub>10</sub>). Black bars indicate geometric mean of the titers within each group. (B,C) Humoral immune responses were measured over time by EBOV and SUDV GP-specific ELISA. Each symbol represents an individual NHP at the indicated time point, with the closed circles representing the non-symptomatic survivors, open circles the non-survivors, and triangles the symptomatic survivors. (D) Cellular immune responses were measured by IFN- $\gamma$  ELISpot and are expressed as SFU per 10<sup>6</sup> PBMC against various peptide pools per animal at the indicated time points (responses were corrected for background responses). The EBOV peptide pool consists of two peptide pools, which are pools of EBOV Mayinga GP-specific peptides (51 and 49 peptides); SUDV consists of two pools containing 58 SUDV Gulu-specific peptides each; and MARV contains two peptide pools covering the complete MARV Angola GP sequence (43 and 44 peptides per pool). EboCon is a peptide pool containing 118 conserved peptides from EBOV GP, EBOV Ivory Coast GP, and SUDV Gulu GP. \* Denotes high background. MARV, Marburg virus; VNA, virus neutralization assay; IC<sub>50</sub>, half-maximal inhibitory concentration; LOD, limit of detection; Ad26, adenoviral vector serotype 26; MVA, modified vaccinia Ankara; Ad35, adenoviral vector serotype 35; EBOV, Ebola virus; GP, glycoprotein; ELISA, enzyme-linked immunosorbent assay; EU, ELISA unit; SUDV, Sudan virus; i.m., intramuscularly; TBS, Tris-buffered saline; vp, viral particle; TCID<sub>50</sub>, median tissue culture infectious dose; NHP, non-human primate; IFN- $\gamma$ , interferon gamma; SFU, spot-forming units; PBMC, peripheral blood mononuclear cells.

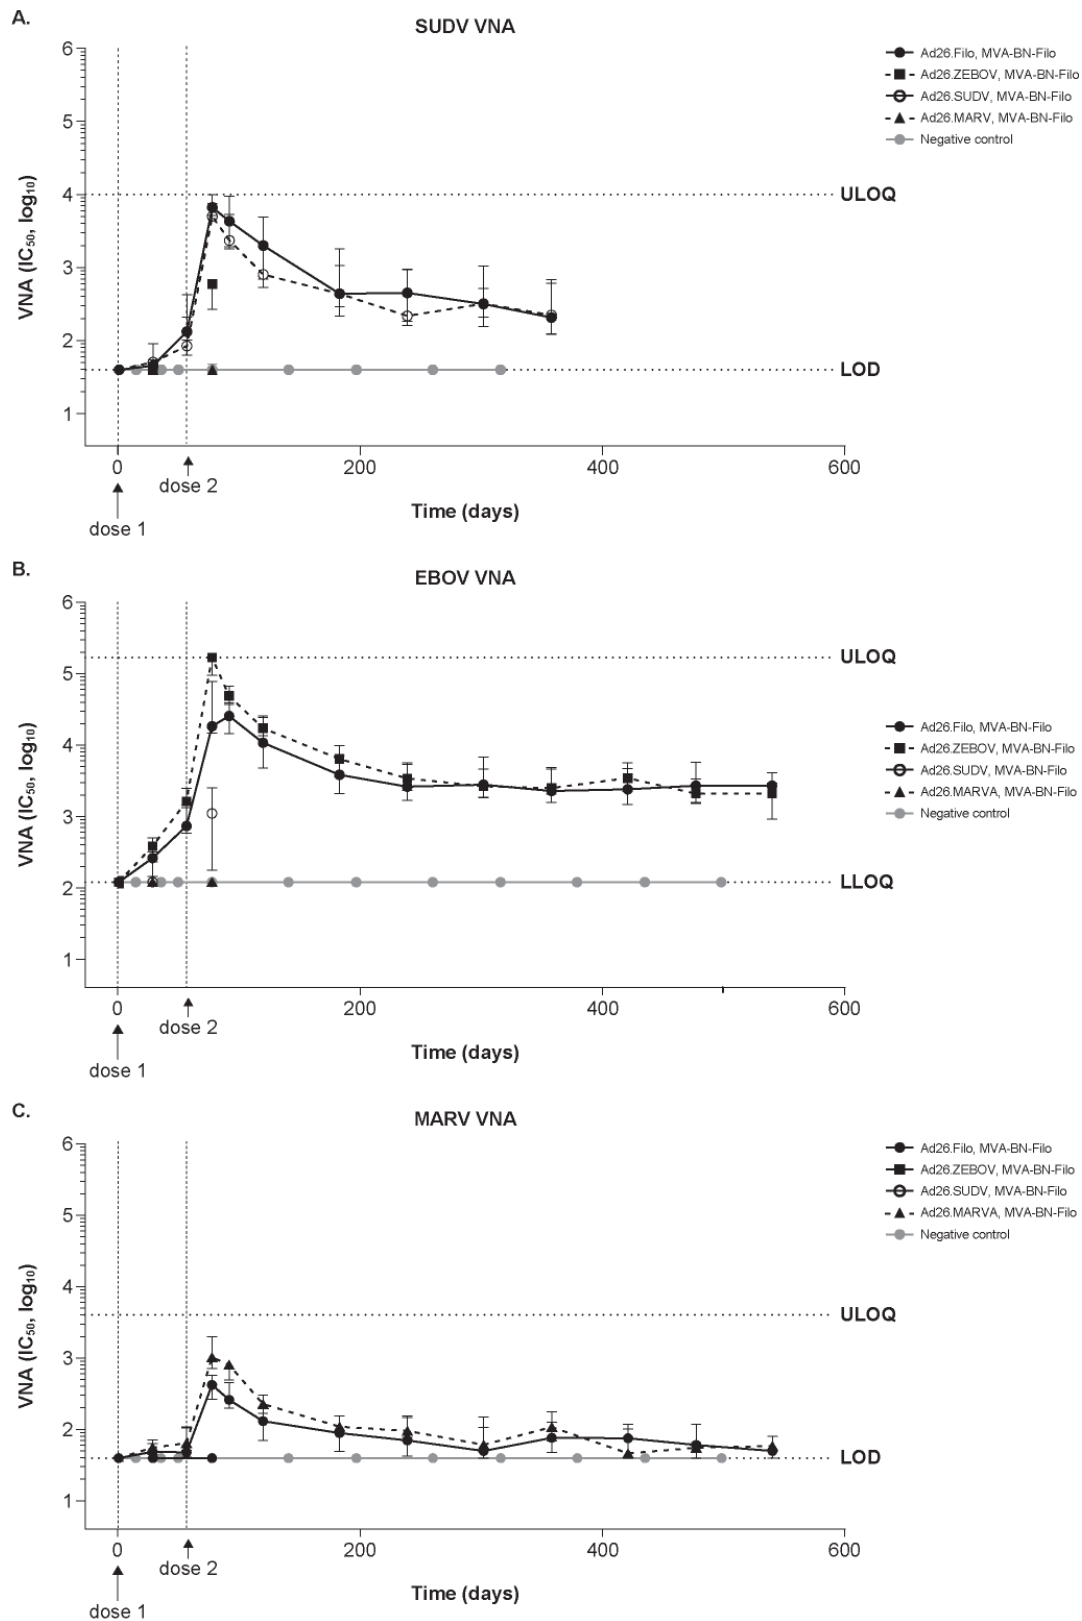

**Supplementary Figure S4.** Neutralizing GP-specific antibodies against SUDV, EBOV, and MARV. Cynomolgus macaques were immunized i.m. with a two-dose vaccine regimen, with an 8-week interval between dose 1 and dose



2. Virus neutralizing antibody responses were monitored up to day 358 (SUDV) or day 540 (MARV and EBOV). One group (n = 10) received the trivalent Ad26.Filo ( $1.2 \times 10^{11}$  vp) followed by MVA-BN-Filo ( $5 \times 10^8$  infU) as dose 2. Three other groups received a monovalent Ad26 (Ad26.EBOV, Ad26.SUDV, or Ad26.MARVA) at  $4 \times 10^{10}$  vp followed by MVA-BN-Filo ( $5 \times 10^8$  infU) (n = 5 per group). A negative control group (n = 5) received two injections with saline 2 weeks apart. (A) SUDV, (B) EBOV Makona, and (C) MARV neutralization are expressed as IC<sub>50</sub> titers on a log<sub>10</sub> scale. Horizontal dotted lines indicate LLOQ or LOD of the assay and ULOQ. Vertical dotted lines indicate time of immunization. The points indicate median of the titers within the group, and whiskers show interquartile range. SUDV, Sudan virus; VNA, virus neutralization assay; IC<sub>50</sub>, half-maximal inhibitory concentration; ULOQ, upper limit of quantification; LOD, limit of detection; Ad26, adenoviral vector serotype 26; MVA, modified vaccinia Ankara; EBOV, Ebola virus; LLOQ, lower limit of quantification; MARV, Marburg virus; i.m., intramuscularly; vp, viral particle; infU, infectious unit.

## Reference

1. Callendret, B.; Vellinga, J.; Wunderlich, K.; Rodriguez, A.; Steigerwald, R.; Dirmeier, U.; Cheminay, C.; Volkmann, A.; Brasel, T.; Carrion, R., et al. A prophylactic multivalent vaccine against different filovirus species is immunogenic and provides protection from lethal infections with Ebolavirus and Marburgvirus species in non-human primates. *PLoS ONE* **2018**, *13*, e0192312; <https://doi.org/10.1371/journal.pone.0192312>.
